# Supplementary material for: The Impact of Vanilla and Lemon Aromas on Sensory Perception in Plant-Based Yogurts Measured with Static and Dynamic Methods
Source: MDPI journal article supplement (doi:10.3390/foods11142030), 2022-07-08
Supplement: s1 [file s1]

**Table S1.** The levels of the main effects (sample, panelist, and session) and interaction effects (sample by session, panelist by sample, and session by panelist) by a three-way ANOVA: A) without the nose clip and B) with the nose clip. Statistically significant differences presented: \*\*\*P < 0.001, \*\* < 0.01, \*P < 0.05.

| A)               | Thickness |         |           | Stickiness |           | Melting sensation |           | Sweetness |           | Grain-like flavor |           | Aroma intensity |           |
|------------------|-----------|---------|-----------|------------|-----------|-------------------|-----------|-----------|-----------|-------------------|-----------|-----------------|-----------|
|                  | df        | F-value | p         | F-value    | p         | F-value           | p         | F-value   | p         | F-value           | p         | F-value         | p         |
| Session          | 3         | 0.710   | 0.547     | 0.642      | 0.589     | 1.771             | 0.154     | 1.577     | 0.196     | 1.452             | 0.229     | 0.573           | 0.633     |
| Sample           | 4         | 0.665   | 0.617     | 0.984      | 0.417     | 1.617             | 0.172     | 2.538     | 0.041*    | 38.945            | <0.001*** | 31.633          | <0.001*** |
| Panelist         | 9         | 21.019  | <0.001*** | 11.882     | <0.001*** | 9.038             | <0.001*** | 24.948    | <0.001*** | 6.837             | <0.001*** | 3.785           | <0.001*** |
| Sample*Session   | 12        | 0.419   | 0.955     | 0.520      | 0.900     | 0.573             | 0.862     | 0.224     | 0.997     | 0.208             | 0.998     | 0.524           | 0.897     |
| Panelist*Sample  | 36        | 0.784   | 0.801     | 0.838      | 0.728     | 0.779             | 0.809     | 1.592     | 0.029*    | 2.361             | <0.001*** | 2.078           | <0.001*** |
| Session*Panelist | 27        | 1.157   | 0.284     | 1.903      | 0.008**   | 1.852             | 0.010**   | 2.843     | <0.001*** | 0.491             | 0.984     | 0.705           | 0.857     |

| B)               | Thickness |         |           | Stickiness |           | Melting sensation |           | Sweetness |           |
|------------------|-----------|---------|-----------|------------|-----------|-------------------|-----------|-----------|-----------|
|                  | df        | F-value | p         | F-value    | p         | F-value           | p         | F-value   | p         |
| Session          | 3         | 1.247   | 0.294     | 0.390      | 0.760     | 1.723             | 0.163     | 0.420     | 0.739     |
| Sample           | 4         | 1.021   | 0.398     | 0.189      | 0.944     | 0.278             | 0.892     | 0.074     | 0.990     |
| Panelist         | 9         | 11.224  | <0.001*** | 16.332     | <0.001*** | 7.262             | <0.001*** | 111.350   | <0.001*** |
| Sample*Session   | 12        | 0.374   | 0.971     | 0.635      | 0.810     | 0.291             | 0.990     | 0.085     | 1.000     |
| Panelist*Sample  | 36        | 0.621   | 0.952     | 0.482      | 0.994     | 1.676             | 0.017*    | 0.834     | 0.733     |
| Session*Panelist | 27        | 1.891   | 0.008**   | 3.114      | <0.001*** | 1.966             | 0.005**   | 4.509     | <0.001*** |
